# Supplementary material for: Synthesis, characterization, and biophysical interaction studies of water-dispersible polypyrrole/polythiophene co-oligomers with bovine serum albumin and human serum albumin: an experimental and theoretical approach
Source: Royal Society of Chemistry journal article supplement (doi:10.1039/d2nj05791c), 2023-01-01
Supplement: d2nj05791c1.pdf [file d2nj05791c1.pdf]

# Synthesis, Characterization, and Biophysical Interaction Studies of Water-Dispersible Polypyrrole/Polythiophene Co-oligomers with Bovine Serum Albumin and Human Serum albumin: An Experimental and Theoretical Approach

Ufana Riaz <sup>a,b\*</sup>, Aaliyah Farooq<sup>b</sup>, Nuzhat Mir<sup>b</sup>, Faith R Nwanze<sup>a</sup> and Fei Yan<sup>a</sup>

<sup>a</sup>Department of Chemistry and Biochemistry, North Carolina Central University, NC, 27707, USA

<sup>b</sup>Materials Research Laboratory, Department of Chemistry, Jamia Millia Islamia, New Delhi 110025, India, \*Corresponding author: Fax-(+91-112-684-0229); E-mail address- ([ufana2002@yahoo.co.in](mailto:ufana2002@yahoo.co.in))

| S.no | Figure caption                                                                                       | Pg no |
|------|------------------------------------------------------------------------------------------------------|-------|
| 1.   | Table S1 Solubility of homo-oligomers and co-oligomers in different polar/nonpolar solvents          | S2    |
| 2.   | Figure S1 <sup>1</sup> H-NMR spectra of (a) WS-PPy, (b) WS-PTh, (c) WS-PPy/PTh-1/1                   | S3    |
| 3.   | Figure S2 <sup>13</sup> C-NMR (a) WD-PPy, (b) WD-PTh, (c) WS-PPy/PTh-1/1                             | S5    |
| 4.   | Figure S3 FTIR of (a) WD-PPy, (b) WD-PTh, (c) WD-PPy/PTh-4/1, (d) WD-PPy/PTh-1/1, (e) WD-PPy/PTh-1/4 | S7    |

**Table S1 Solubility of homo-oligomers and co-oligomers in different polar/nonpolar solvents**

| <b>Polymer/copolymer</b> | <b>Water</b> | <b>NMP</b> | <b>DMSO</b> | <b>THF</b> | <b>Ethanol</b> | <b>Acetone</b> |
|--------------------------|--------------|------------|-------------|------------|----------------|----------------|
| WS-PPy                   | D            | S          | S           | D          | IS             | IS             |
| WS-PTh                   | D            | S          | S           | D          | IS             | IS             |
| <b>WS-PPy/PTh-4/1</b>    | D            | S          | S           | D          | IS             | IS             |
| <b>WS-PPy/PTh-1/1</b>    | D            | S          | S           | D          | IS             | IS             |
| <b>WS-PPy/PTh-1/4</b>    | D            | S          | S           | D          | IS             | IS             |

**S-soluble; D- dispersed; IS- insoluble. The solution was prepared by dissolving 0.1 mg in 10 ml of the solvent**

(a)

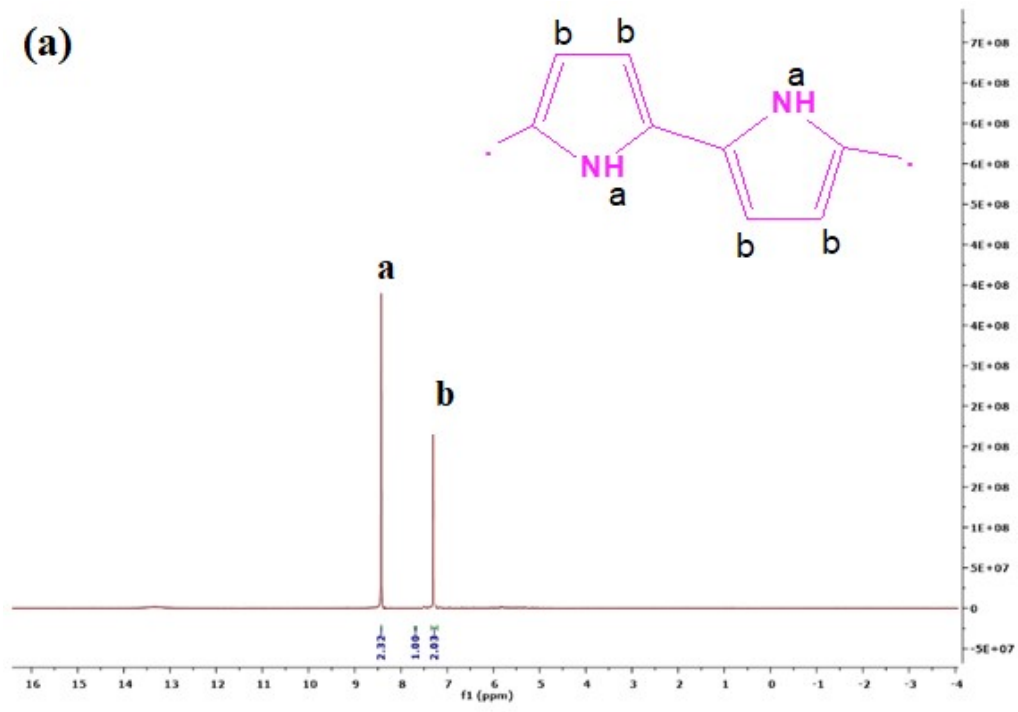

(b)

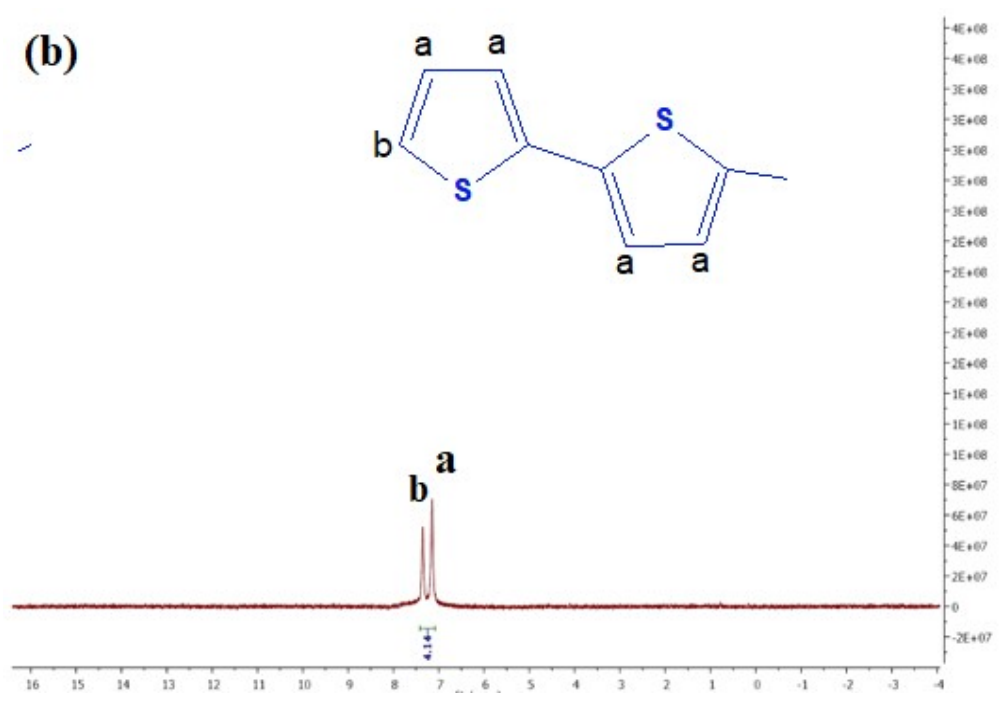

(c)

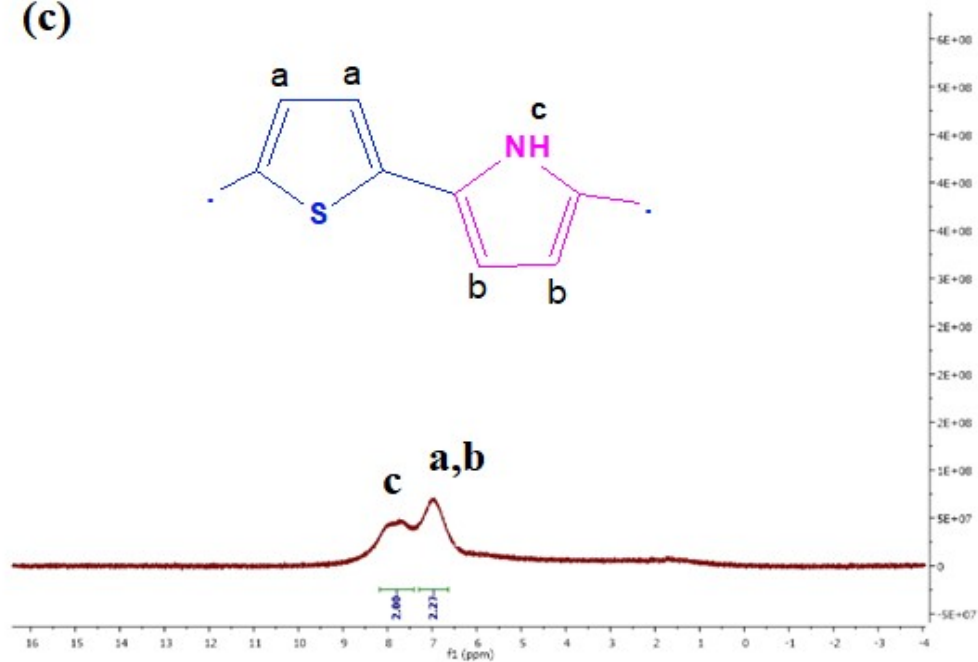

Figure S1 <sup>1</sup>H NMR spectra of (a) WD-PPy, (b) WD-PTh, (c) WD-PPy/PTh-1/1

(a)

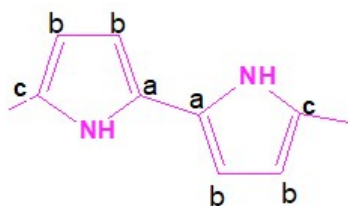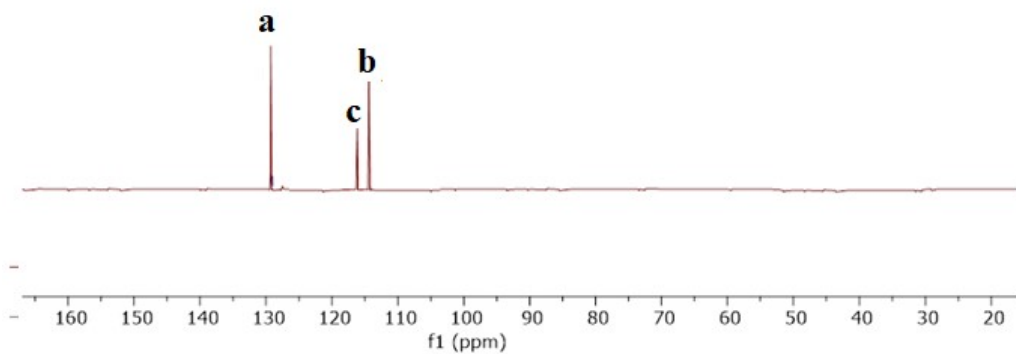

(b)

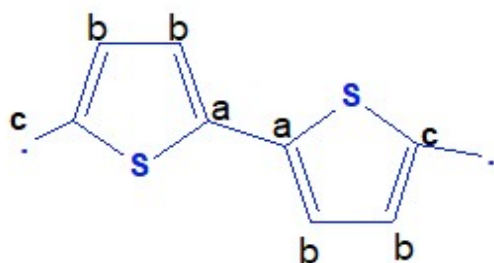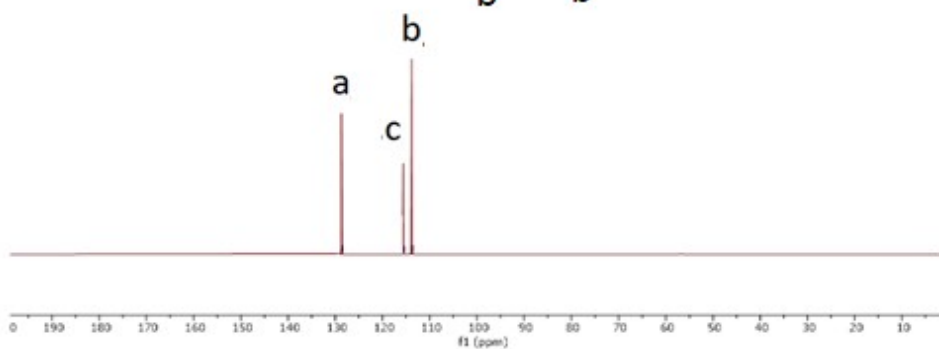

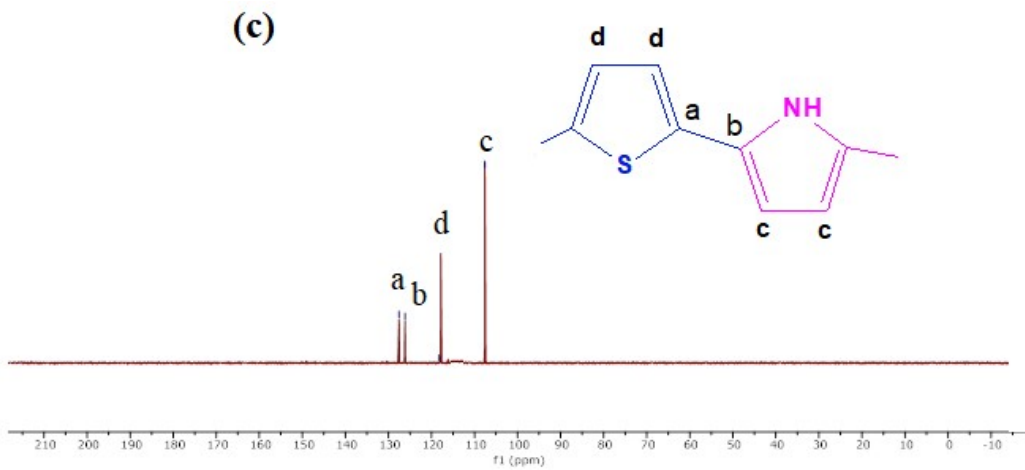

**Figure S2**  $^{13}\text{C}$ -NMR spectra of (a) WD-PPy, (b) WD-PTh, (c) WD-PPy/PTh-1/1

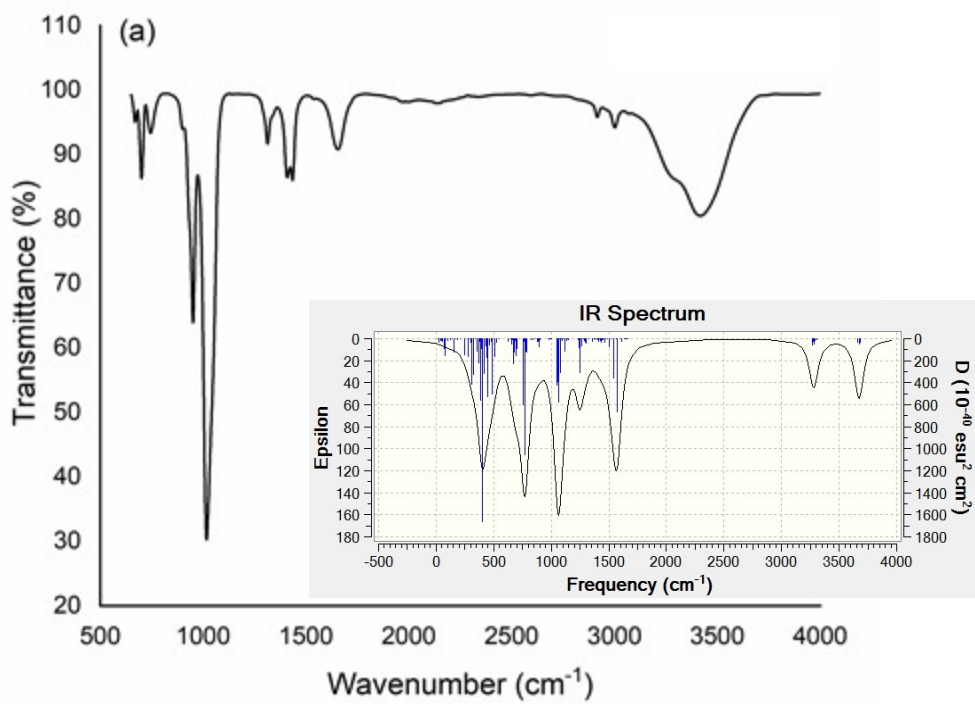

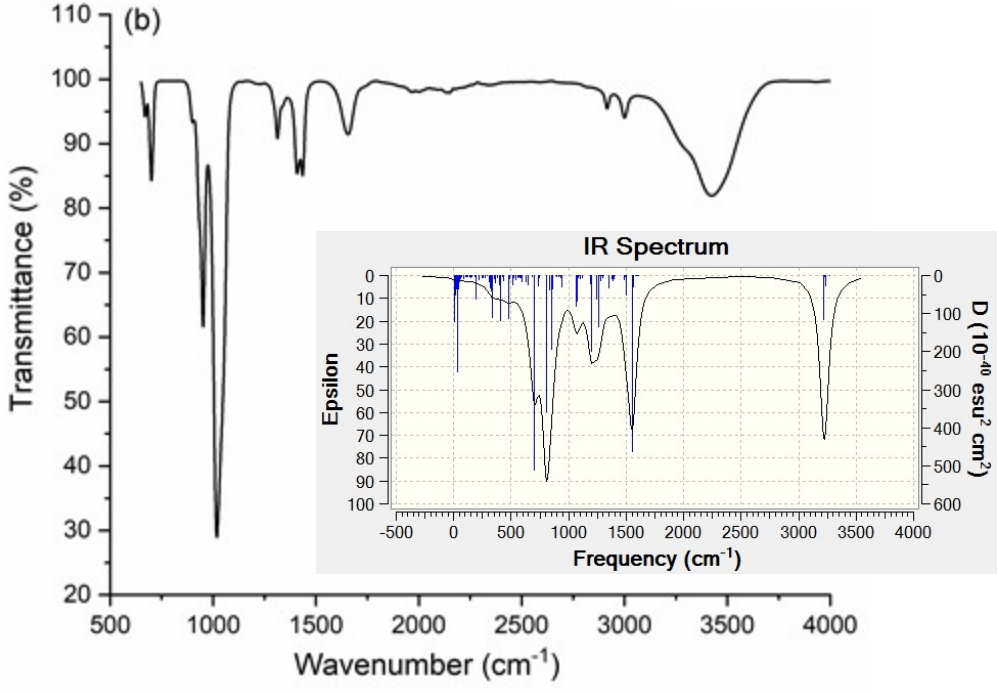



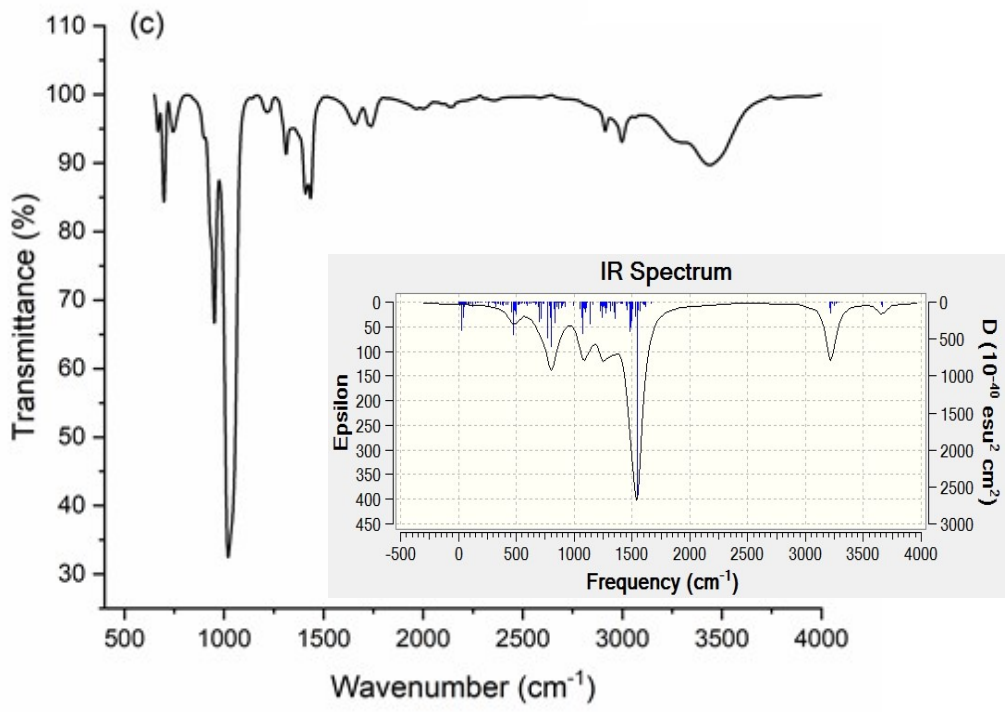

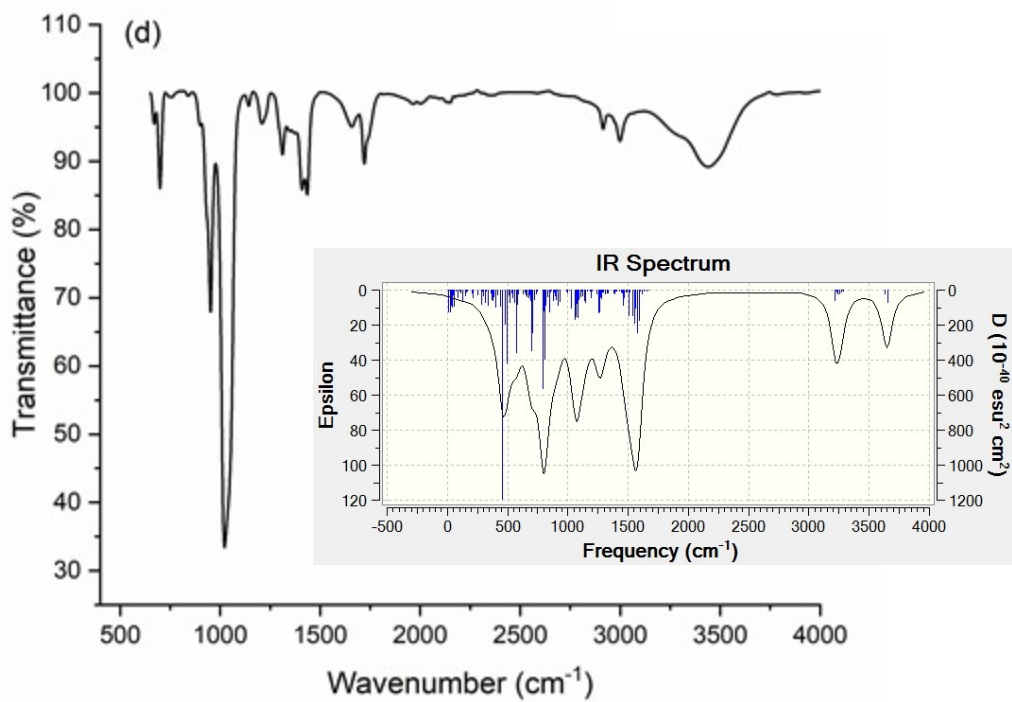

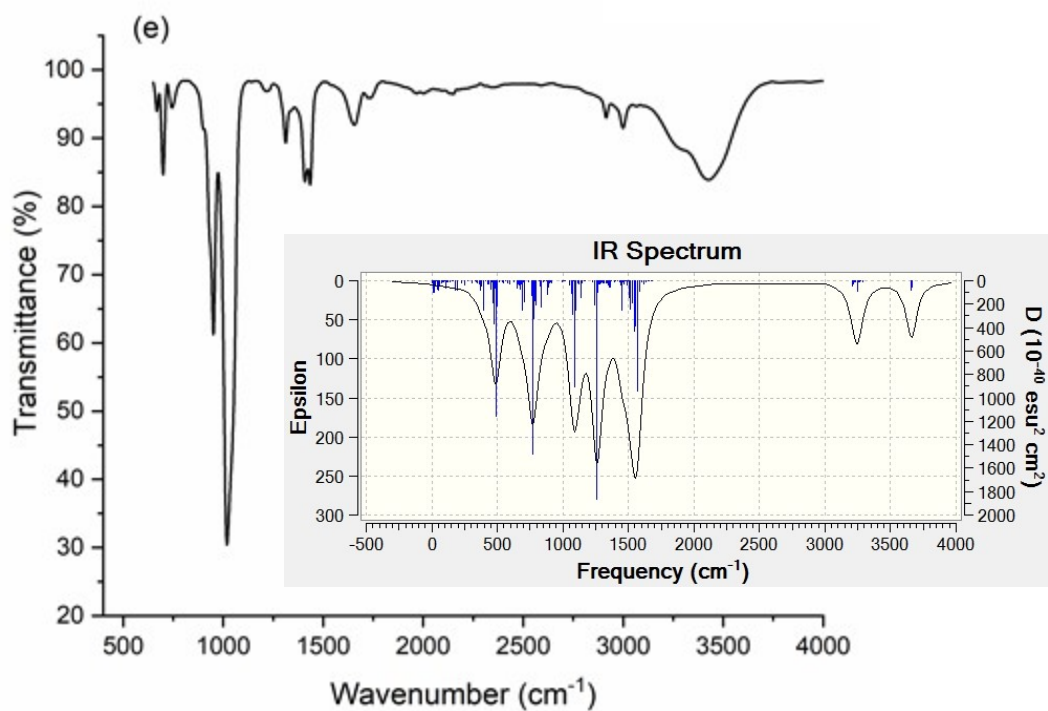

**Figure S3 FTIR of (a) WD-PPy, (b) WD-PTh, (c) WD-PPy/PTh-4/1, (d) WD-PPy/PTh-1/1, (e) WD-PPy/PTh-1/4**
